# Supplementary material for: Characterising Hydroxyapatite Deposited from Solution onto Novel Substrates: Growth Mechanism and Physical Properties
Source: MDPI journal article supplement (doi:10.3390/nano13172483), 2023-09-03
Supplement: s1 [file s1]

# Characterising Hydroxyapatite Deposited from Solution onto Novel Substrates: Growth Mechanism and Physical Properties

Brid Murphy <sup>1,2,\*</sup>, Jhonattan Baez <sup>1,2</sup> and Mick A. Morris <sup>1,2,\*</sup>

<sup>1</sup> Advanced Materials & Bioengineering Research Centre (AMBER), Trinity College Dublin, Dublin 2, D02 CP49 Dublin, Ireland

<sup>2</sup> School of Chemistry, Trinity College Dublin, Dublin 2, D02 PN40 Dublin, Ireland

\* Correspondence: murphb52@tcd.ie (B.M.); morrism2@tcd.ie (M.A.M.)

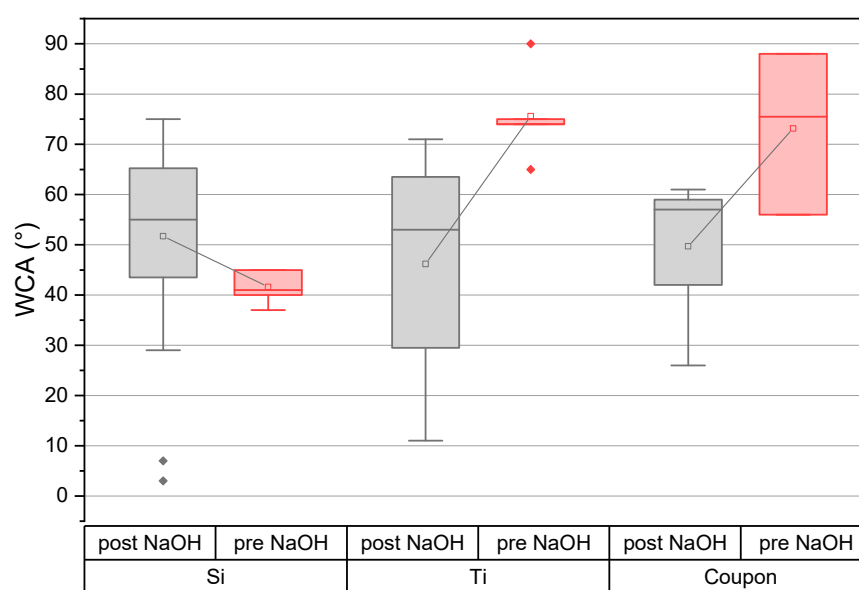

**Figure 1.** WCA in ° measured for each substrate pre and post activation.

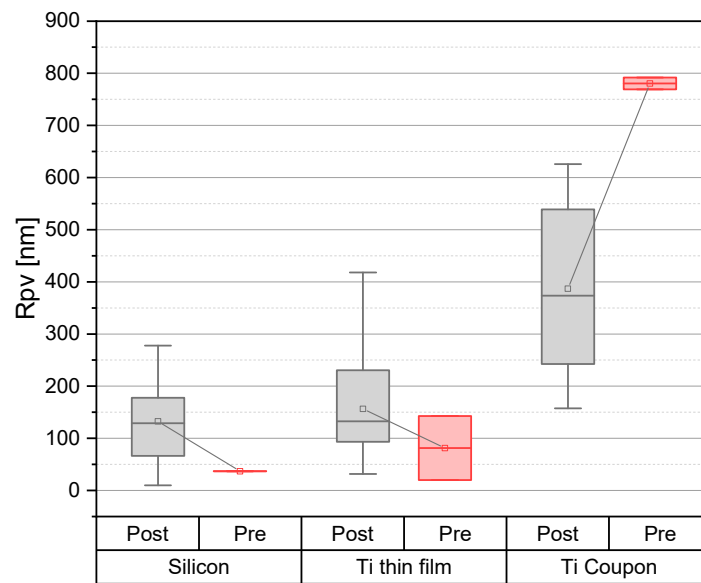

**Figure 2.** The peak-to-valley (R<sub>pv</sub>) roughness of the three substrates pre- and post-activation as measured by atomic force microscopy.

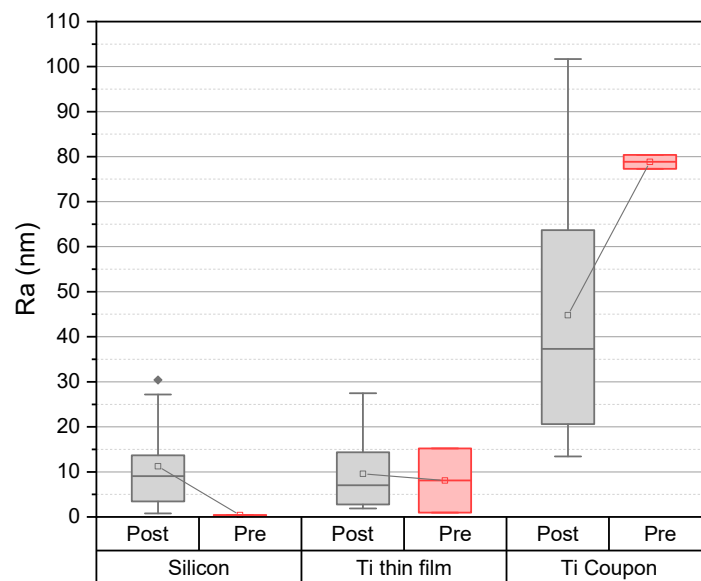

**Figure 3.** The average roughness (R<sub>a</sub>) of the three substrates pre- and post-activation as measured by atomic force microscopy.

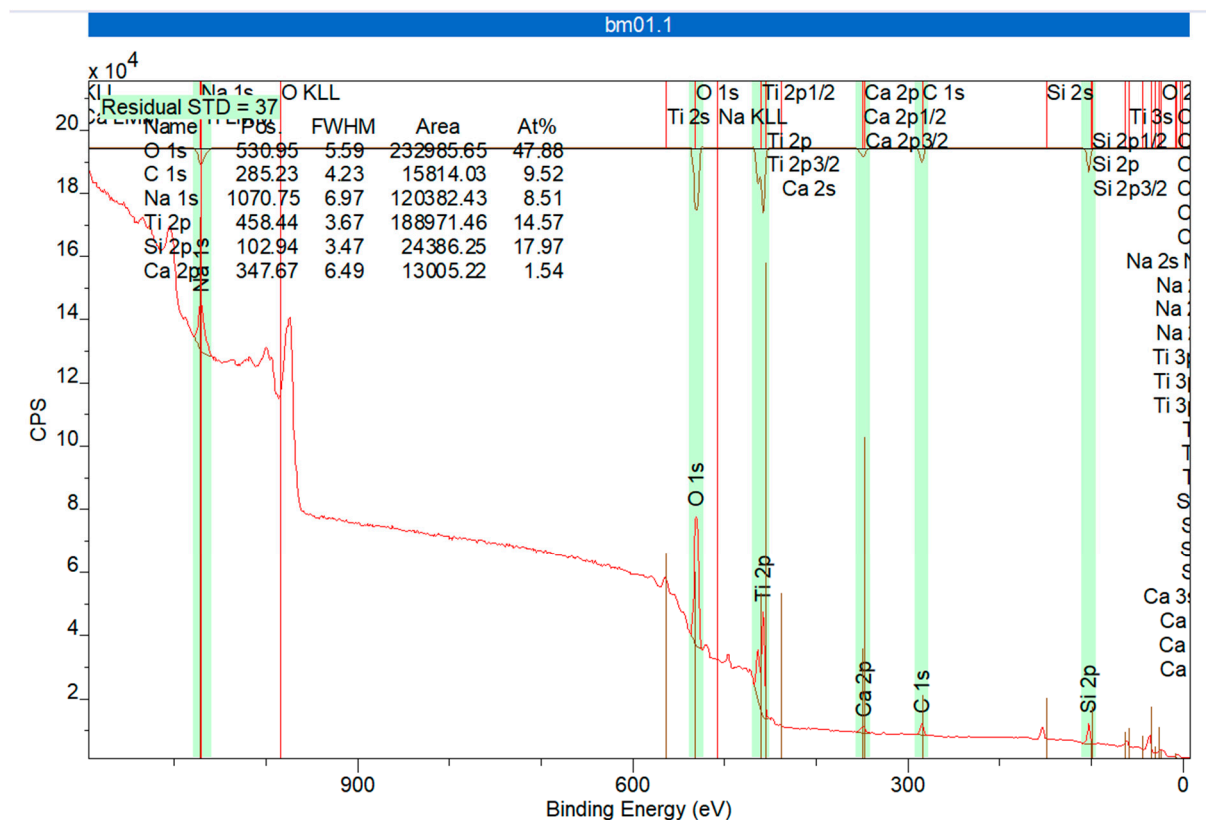

**Figure 4.** X-Ray Photoelectron spectroscopy analysis, showing the Survey Scan of HA coated titanium thin film (Sample 1), Y-axis: counts per second [CPS] versus X-axis: binding energy [eV].

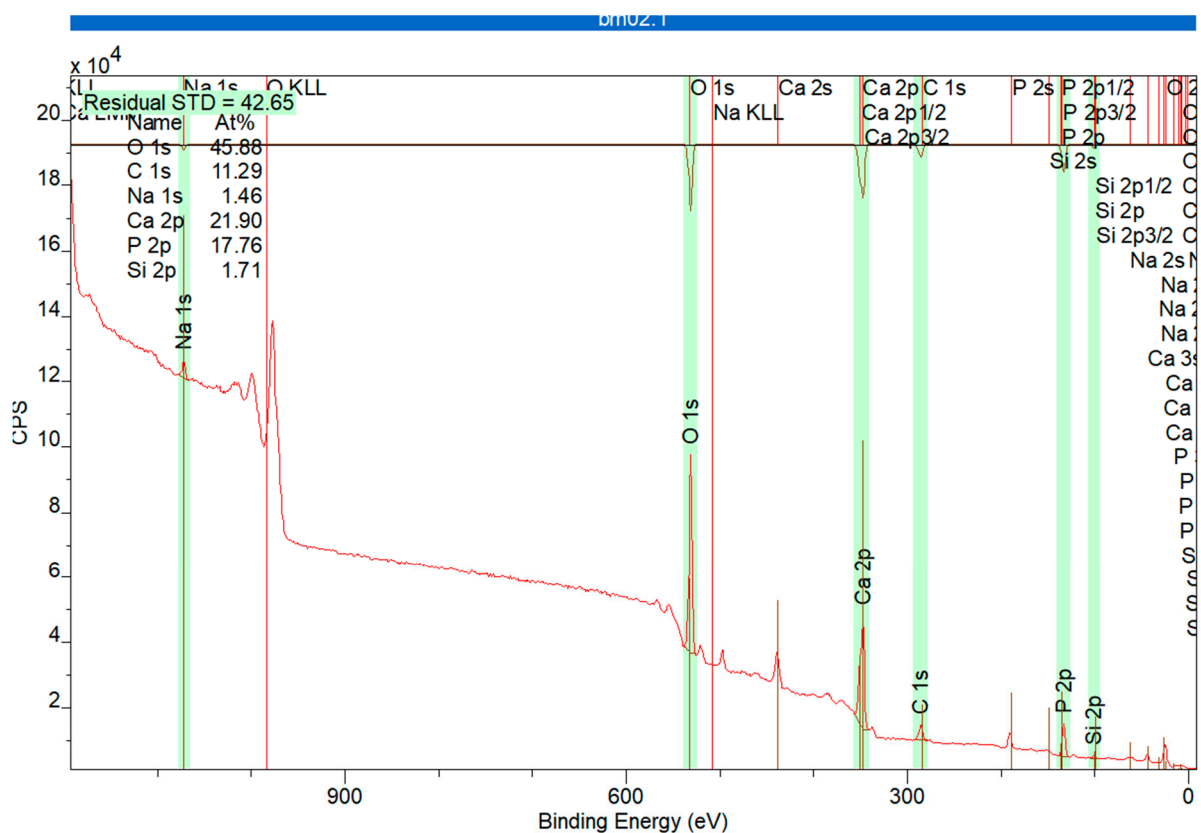

**Figure 5.** X-Ray Photoelectron spectroscopy analysis, showing the Survey Scan of HA coated titanium thin film (Sample 2), Y-axis: counts per second [CPS] versus X-axis: binding energy [eV].

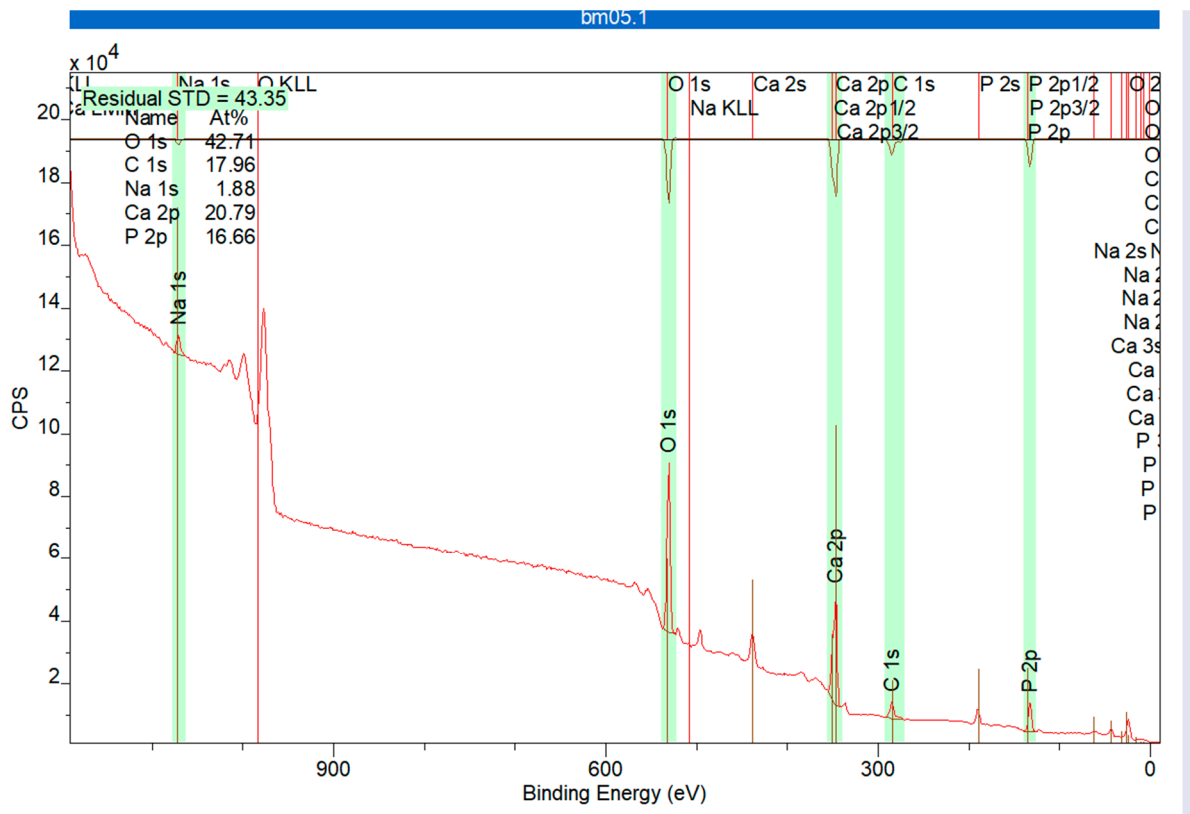

**Figure 6.** X-Ray Photoelectron spectroscopy analysis, showing the Survey Scan of HA coated titanium thin film (Sample 3), Y-axis: counts per second [CPS] versus X-axis: binding energy [eV].
